# Supplementary material
Source: PubMed Central journal article supplement (PMC3436114)
Supplement: supp_139.19.3623_DEV081661TableS1.pdf [file supp_139.19.3623_DEV081661TableS1.pdf]

**Table S1. Core methylation-dependent candidate genes**

| <b><u>Gene</u></b>   | <b><u>Tissue of expression</u></b> | <b><u>Function</u></b>             |
|----------------------|------------------------------------|------------------------------------|
| <i>Asz1</i>          | Germline                           | piRNA pathway*                     |
| <i>Mov10l1</i>       | Germline                           | piRNA pathway*                     |
| <i>Mili</i>          | Germline                           | piRNA pathway*                     |
| <i>Tex19.1</i>       | Germline                           | Post-transcriptional regulation*   |
| <i>Dazl</i>          | Germline                           | Post-transcriptional regulation*   |
| <i>Tex19.2</i>       | Germline                           | Post-transcriptional regulation? * |
| <i>Rps4y2</i>        | Germline                           | Ribosomal protein                  |
| <i>Rhox5</i>         | Testis/Germline?                   | Transcriptional regulation         |
| <i>LAP</i>           | Germline                           | Retrotransposon                    |
| <i>1700034E13Rik</i> | Germline                           | ND                                 |
| <i>4930550L24Rik</i> | Germline                           | ND                                 |
| <i>Rhox4d</i>        | Germline                           | ND                                 |
| <i>Tex13</i>         | Germline                           | ND                                 |
| <i>Akr1c12</i>       | Digestive system                   | Aldo-Keto metabolism               |
| <i>Aldh3a1</i>       | Eye                                | Aldehyde bioprocessing             |
| <i>Gpr97</i>         | Haematopoetic system               | G-protein receptor                 |
| <i>Nckap11</i>       | Haematopoetic system               | Cell polarity                      |
| <i>Slc15a3</i>       | Haematopoetic system               | Biomolecule transport              |
| <i>Slc47a1</i>       | Kidney                             | Biomolecule transport              |
| <i>Gstp2</i>         | Liver                              | Metabolism                         |
| <i>Tnnt1</i>         | Muscle/Adipose                     | Muscle function                    |
| <i>Casp1</i>         | Semi-ubiquitous                    | Apoptosis                          |
| <i>Iigp2</i>         | Semi-ubiquitous                    | GTPase                             |
| <i>Prelp</i>         | Semi-ubiquitous                    | ND                                 |
| <i>Xlr4a</i>         | Semi-ubiquitous                    | ND                                 |
| <i>Xist</i>          | Semi-ubiquitous                    | X-chromosome inactivation          |
