# Supplementary material
Source: PubMed Central journal article supplement (PMC3436114)
Supplement: supp_139.19.3623_DEV081661TableS2.pdf [file supp_139.19.3623_DEV081661TableS2.pdf]

**Table S2. RT-PCR primers**

| <b>Gene</b>       | <b>Amplification Primers (5'-3')</b>                                  | <b>Anneal</b> | <b>Product (bp)</b> |
|-------------------|-----------------------------------------------------------------------|---------------|---------------------|
| <i>Ant4</i>       | ATGTCGAACGAATCCTCCAAGA<br>AGCTTCACACGCTCGATGG<br>GAAGTTAACGCCCAGGATGA | 56°C          | 140                 |
| <i>Asz1</i>       | GGTGTTCTGCCATCTTTGGT<br>TCTTTGCCAGATATGGCTCAGT                        | 56°C          | 134                 |
| <i>Dazl</i>       | CTTCTGCACATCCACGTCATTA<br>ACCCAGAAGACTGTGGATGG                        | 56°C          | 110                 |
| <i>Gapdh</i>      | GGTCCTCAGTGTAGCCCAAG<br>CGAGGATTTTCGATTCCATTGCC                       | 56°C          | 289                 |
| <i>Mael</i>       | GGCTCTATCATCAGACTTGCAGT<br>CATTATGGTCAAGTATCTGTT                      | 56°C          | 171                 |
| <i>Mili</i>       | AGAGGTTGGCGAGGAATAAGG<br>ACAACATTGTCCAGGGAAGC                         | 56°C          | 241                 |
| <i>Mili 3'</i>    | TGGCCTTGGTCATAGACTCC<br>ACTCCCAAACCTCCGAGTCACA                        | 56°C          | 113                 |
| <i>Miwi2</i>      | GGCCCGTCCACTCATGTTC<br>TTCCCTCTATGCAGGTGACAA                          | 56°C          | 116                 |
| <i>Mov1011</i>    | AAGTGCATAGTGACACCGTCT<br>TTGGTTGATCAGTTCTCGAG                         | 56°C          | 208                 |
| <i>Mvh</i>        | CCAAAAGTGACATATATACCC<br>AGGGTCTGCTACTGAGATGCTCTG                     | 56°C          | 417                 |
| <i>Nanog</i>      | CAACCACTGGTTTTTCTGCCACCG<br>CAAATCGGAGACCCTGGTG                       | 56°C          | 364                 |
| <i>Oct4</i>       | AGCCTCATACTCTTCTCGTTGG<br>TCCTGGAGGACTGGTTTGAC                        | 56°C          | 238                 |
| <i>Oasl1</i>      | ACTGAAGACGTGGACCATCC<br>ACTCCCATGACTTCTGTCAAT                         | 56°C          | 205                 |
| <i>Pramell1</i>   | GGGAActATATCTCCATGCCT<br>AACGTTTTGAAGCCAGGATG                         | 56°C          | 448                 |
| <i>Rtp3</i>       | CCTTGGCCTTCTTCTCACAC<br>TCCGCTGGGAAGTCGTTGATG                         | 56°C          | 139                 |
| <i>Taf7l</i>      | GTGGTTCCACCCAGTCTTCAT<br>TTTTGGCCCACACTAAACTCG                        | 56°C          | 620                 |
| <i>Tex13</i>      | TGTAGTCTCGCACAACCTCTCA<br>AAAATGGGCCACCCACATCTC                       | 56°C          | 108                 |
| <i>Tex19.1</i>    | CCACTGGCCCTTGGACCAGAC<br>CGTGTCAGTGTTCAAGTGTG                         | 56°C          | 184                 |
| <i>Tex19.1 3'</i> | ATGACAGTAAGGTCAACTAGTGC<br>TGGCTCATCCCTCCTTTGTC                       | 55°C          | 140                 |
| <i>Tex19.2</i>    | CAGCATGTAGCAAATGGCGTC<br>CGGAAGGTTAGACTCAGCTTC                        | 56°C          | 180                 |
| <i>Tex19.2 3'</i> | AACTCTGAATCCAGGACTCAC<br>GATCCATTGGAGGGCAAGTCT                        | 55°C          | 198                 |
| 18S rRNA          | CCAAGATCCAACACTACGAGCTTTTT                                            | 56°C          | 103                 |
