# Supplementary material
Source: PubMed Central journal article supplement (PMC3436114)
Supplement: supp_139.19.3623_DEV081661TableS3.pdf [file supp_139.19.3623_DEV081661TableS3.pdf]

**Table S3. Bisulfite sequencing and ChIP and meDIP primers**

| <b>Gene promoter</b>                 | <b>Primer (5'-3')</b>                                | <b>Anneal</b> | <b>Product (bp)</b> |
|--------------------------------------|------------------------------------------------------|---------------|---------------------|
| <b>Bisulphite sequencing primers</b> |                                                      |               |                     |
| <i>Dazl</i>                          | ATAAAAAAAAAAACCCACRACCAC<br>GAGGTAATGATTTGAATAAA     | 50°C          | 405                 |
| <i>Dazl Nested</i>                   | AGGTAATGATTTGAATAAAT<br>AAAAAAAAACCAAAAACCCAC        | 52°C          | 240                 |
| <i>Mili</i>                          | GTTTGAGAGTAATTTTTATATAG<br>AAATCTAATACCACTAAACC      | 50°C          | 547                 |
| <i>Mili Nested</i>                   | AGGTTTATTTTAAGAGGT<br>TCCTTCCCTCCTATTCCAA            | 52°C          | 346                 |
| <i>Tex13</i>                         | GATAAATTATTATATTTGGGGGT<br>AACCTCACCTCTCTAAAACTA     | 52°C          | 443                 |
| <i>Tex13 Nested</i>                  | TGGGTTTAAATAAATAGTTG<br>AAAATAACAATCCTAAAACC         | 52°C          | 293                 |
| <i>Tex19.1</i>                       | GGTTTTGTTTTTTGTTGTTG<br>CATTTACATATCTCCATAAAATC      | 50°C          | 617                 |
| <i>Tex19.1Nested</i>                 | TTATTAAAGAGATAGGGAAGAAG<br>ATCCCAAACAACAAAAAAC       | 52°C          | 273                 |
| <i>Tex19.2</i>                       | CAACAAAACCTTATAAAAAATCAAC<br>AAATTTTTGTGTGGTTAAGGTTG | 50°C          | 535                 |
| <i>Tex19.2 Nested</i>                | TTAAAGAGTTTGAGAATAAAAAG<br>AACCCCAAACAACAAAAAAC      | 52°C          | 356                 |
| <b>ChIP primers</b>                  |                                                      |               |                     |
| <i>Dazl</i>                          | TGACGTGCTACAGCCAATAG<br>CAGGAGTCGGTCCATCTGTC         | 56°C          | 175                 |
| <i>Hoxc10</i>                        | GCTAGGTGGCGCTGTTACTC<br>CCAATGGGATTTGAAAATGG         | 56°C          | 107                 |
| <i>IAP</i>                           | CATATTCCAGGTCCTTCAGTGTGC<br>TTCTGGTCTGGAATGAGGG      | 58°C          | 108                 |

|                |                                                      |      |     |
|----------------|------------------------------------------------------|------|-----|
| <i>Maj Sat</i> | GACGACTTGAAAAATGACGAAATC<br>CATATTCCAGGTCCTTCAGTGTGC | 58°C | 74  |
| <i>Mili</i>    | GAATTCCAGTCCACCCTGAC<br>GGCTAGGAGGGTGAAAGGAG         | 56°C | 186 |
| <i>Mov10l1</i> | CAGATGCAAGAACCCCATG<br>TCCTCCAGAAGAAGGACACC          | 56°C | 163 |
| <i>Taf7l</i>   | CAGCAACACTAACGAGACACG<br>GGAAAAACCGCACCCCTTA         | 56°C | 100 |
| <i>Tex19.1</i> | CGACTTTTCCAAACAAGATGTG<br>AGTCACTCTGGCTCTGAAGG       | 56°C | 199 |
| <i>Tex19.2</i> | CTGCAGGCTAAGCACAGTTG<br>TCAAGGTTGAGCTCCAGAGG         | 56°C | 158 |
